# Supplementary material
Source: PubMed Central journal article supplement (PMC6197887)
Supplement: NIHMS983087-supplement-Supporting_Information.pdf [file NIHMS983087-supplement-Supporting_Information.pdf]

**Table of Contents**

|                            |     |
|----------------------------|-----|
| Additional NMR data.....   | S-2 |
| Author Contributions ..... | S-4 |

## Additional NMR data

**Figure S1.** (a) Reaction scheme of cyclopropane hydrogenation with p-H<sub>2</sub> over Rh/TiO<sub>2</sub> catalyst. (b) <sup>1</sup>H NMR spectrum acquired in PASADENA hydrogenation of cyclopropane with 50% enriched p-H<sub>2</sub> at 40 °C over 1 wt.% Rh/TiO<sub>2</sub> catalyst in CD<sub>3</sub>OD. Spectrum was acquired directly after rapid interruption of gas flow (15 sccm of cyclopropane and 20 sccm of H<sub>2</sub> at 90 psig total pressure).

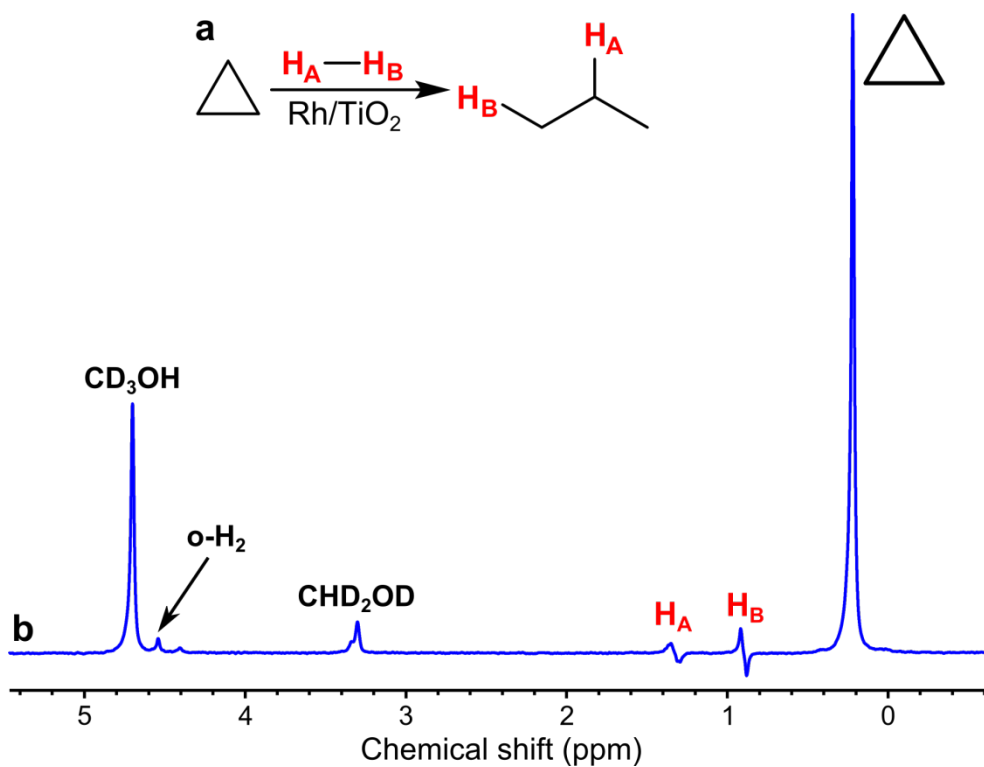

**Figure S2.** Dependence of ALTADENA signal of HP propane produced by hydrogenation of cyclopropane with 82% enriched p-H<sub>2</sub> at 135 °C and 90 psig total pressure over 118 mg of 1 wt.% Rh/TiO<sub>2</sub> catalyst on gas flow rate. The ratio of cyclopropane and H<sub>2</sub> was 1 : 2.

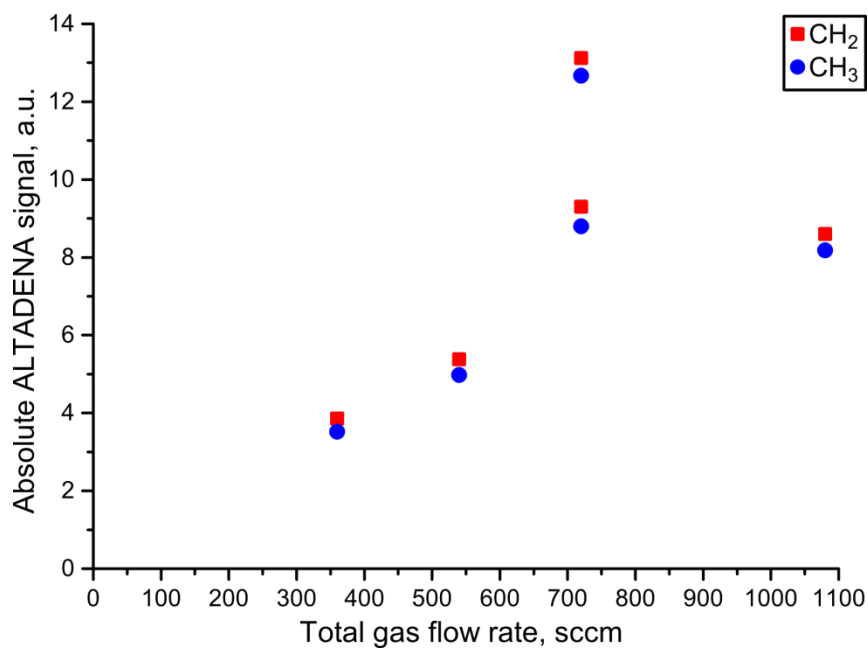

**Table S1.** Results obtained in ALTADENA hydrogenation of cyclopropane with 82% enriched p-H<sub>2</sub> at various temperatures and gas flow rates at 90 psig total pressure over 118 mg of 1 wt.% Rh/TiO<sub>2</sub> catalyst. The ratio of cyclopropane and H<sub>2</sub> was 1 : 2.

| Entry # <sup>[a]</sup> | Temperature, °C | Total gas flow rate, sccm | Cyclopropane conversion, % | NMR signal enhancement (CH <sub>2</sub> ) | NMR signal enhancement (CH <sub>3</sub> ) | Polarization (CH <sub>2</sub> ), % | Polarization (CH <sub>3</sub> ), % |
|------------------------|-----------------|---------------------------|----------------------------|-------------------------------------------|-------------------------------------------|------------------------------------|------------------------------------|
| 1                      | 100             | 720                       | 0.22                       | 390                                       | 350                                       | 1.2                                | 1.1                                |
| 2                      | 100             | 720                       | 0.21                       | 240                                       | 250                                       | 0.76                               | 0.79                               |
| 3                      | 112             | 720                       | 0.30                       | 260                                       | 270                                       | 0.85                               | 0.87                               |
| 4                      | 130             | 720                       | 0.18                       | 360                                       | 360                                       | 1.2                                | 1.1                                |
| 5                      | 135             | 720                       | 0.20                       | 400                                       | 400                                       | 1.3                                | 1.3                                |
| 6                      | 135             | 360                       | 0.27                       | 310                                       | 310                                       | 0.98                               | 0.99                               |
| 7                      | 135             | 1080                      | 0.17                       | 430                                       | 420                                       | 1.4                                | 1.4                                |
| 8                      | 135             | 540                       | 0.19                       | 280                                       | 270                                       | 0.90                               | 0.88                               |
| 9                      | 135             | 720                       | 0.18                       | 480                                       | 460                                       | 1.6                                | 1.5                                |
| 10                     | 160             | 720                       | 0.21                       | 220                                       | 230                                       | 0.71                               | 0.73                               |
| 11                     | 160             | 720                       | 0.18                       | 250                                       | 260                                       | 0.81                               | 0.84                               |
| 12                     | 180             | 720                       | 0.19                       | 220                                       | 230                                       | 0.72                               | 0.76                               |
| 13                     | 200             | 720                       | 0.21                       | 250                                       | 250                                       | 0.80                               | 0.82                               |
| 14                     | 210             | 720                       | 0.24                       | 270                                       | 270                                       | 0.87                               | 0.87                               |
| 15                     | 216             | 720                       | 0.28                       | 280                                       | 270                                       | 0.89                               | 0.88                               |
| 16                     | 130             | 720                       | 0.18                       | 280                                       | 280                                       | 0.90                               | 0.90                               |

[a] In chronological order.

**Figure S3.** Dependence of ALTADENA signal of HP propane produced by hydrogenation of cyclopropane with 82% enriched p-H<sub>2</sub> at 90 psig total pressure over 118 mg of 1 wt.% Rh/TiO<sub>2</sub> catalyst on reaction temperature. The gas flow rates of cyclopropane and H<sub>2</sub> were 240 and 480 sccm, respectively. Data points are connected with lines based on the order of entries (see Table S1).

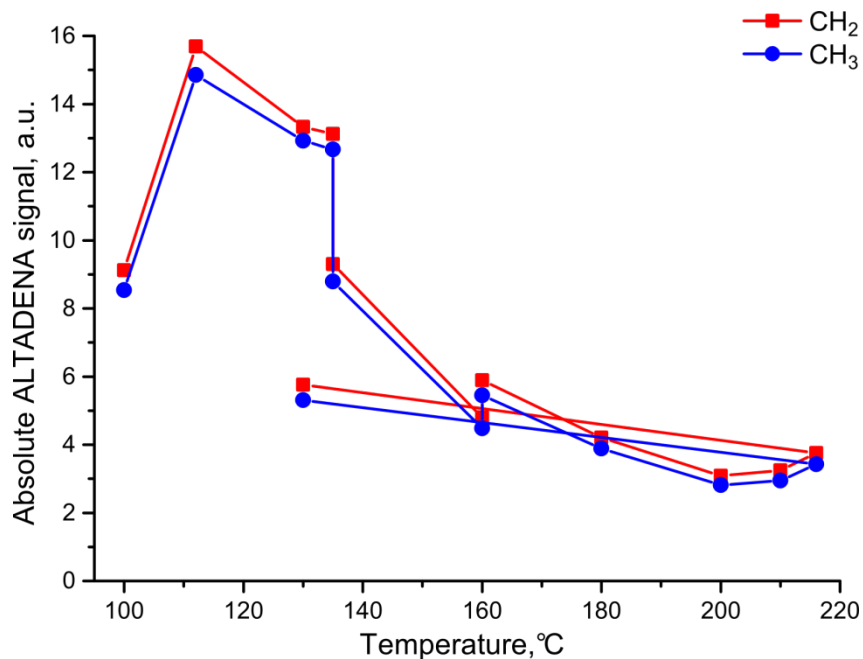

### Author Contributions

K.V.K. and E.Y.C. proposed the idea. O.G.S., K.V.K. and E.Y.C. carried out NMR experiments, O.G.S. and E.Y.C. performed MRI experiments, P.N. and E.Y.C. constructed the HET-PHIP polarizer setup used for ALTADENA experiments, L.M.K. and V.I.B. prepared heterogeneous catalysts, O.G.S. carried out NMR data processing and analysis, E.Y.C. processed MR images. O.G.S., K.V.K., E.Y.C. and I.V.K. discussed the results, O.G.S. wrote the original draft, which was edited mainly by E.Y.C., K.V.K. and I.V.K.
